# Supplementary material for: Theranostic radioiodine-labelled melanin nanoparticles inspired by clinical brachytherapy seeds
Source: Royal Society of Chemistry journal article supplement (doi:10.1039/c8tb02817f), 2018-01-01
Supplement: c8tb02817f1.pdf [file c8tb02817f1.pdf]

## Supporting information

### **Theranostic Radioiodine Labeled Melanin Nanoparticles**

#### **Inspired by Clinical Brachytherapy Seeds**

Jie Sheng<sup>1#</sup>, Xinyu Wang<sup>2#</sup>, Junjie Yan<sup>2</sup>, Donghui Pan<sup>2</sup>, Runlin Yang<sup>2</sup>, Lizhen Wang<sup>2</sup>, Yuping Xu<sup>2</sup>,  
Min Yang<sup>1,2\*</sup>

1. *The First School of Clinical Medicine, Nanjing Medical University, Nanjing, 210029, China*
2. *Key Laboratory of Nuclear Medicine, Ministry of Health, Jiangsu Key Laboratory of Molecular Nuclear Medicine, Jiangsu Institute of Nuclear Medicine, Wuxi, 214063, China*

**Keywords:** melanin, theranostic, radioiodine, labeling, I-131

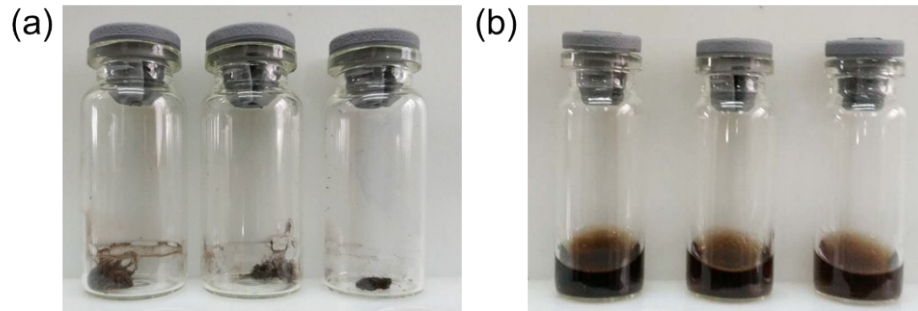

**Figure S1.**(a) Dry powder of MNP, MNP-I and MNP-Ag-I and. (b)Solution of MNP, MNP-I and MNP-Ag-I.

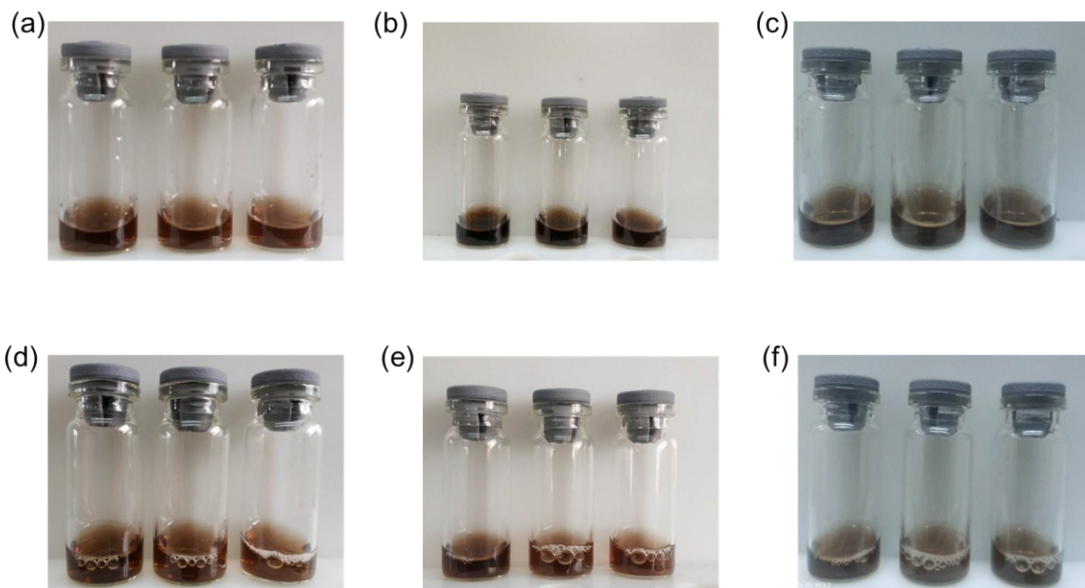

**Figure S2.** MNP, MNP-I and MNP-Ag-I incubation with PBS for 0 h (a), 24 h (b) and 48 h (c). MNP, MNP-I and MNP-Ag-I incubation with serum for 0 h (d), 24 h (e) and 48 h (f).

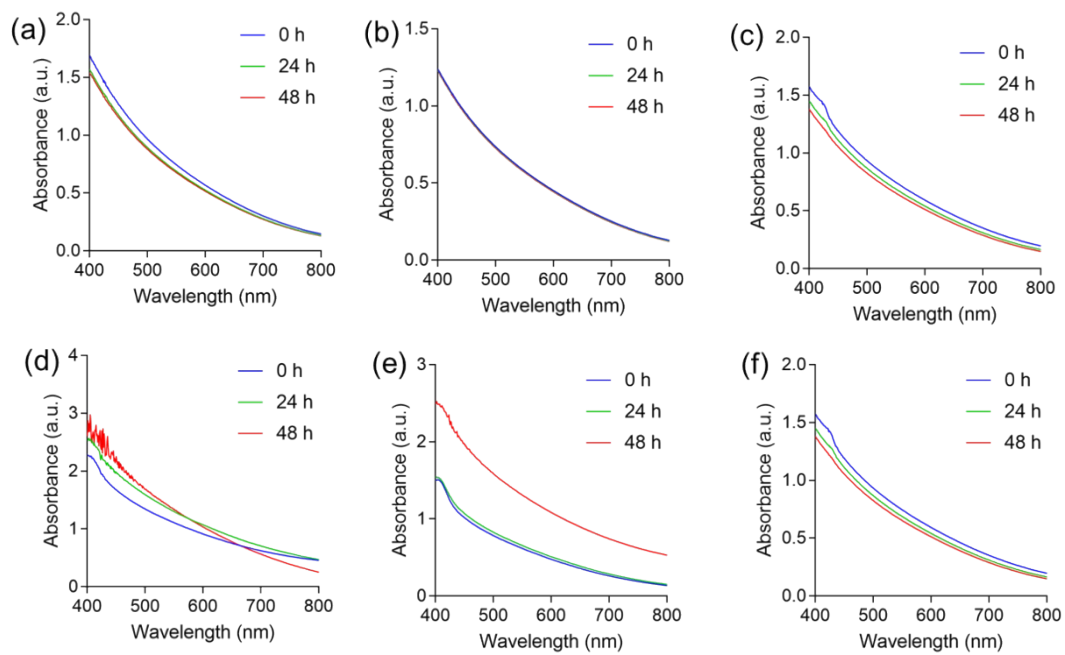

Figure S3. UV-vis-NIR spectra of MNP, MNP-I and MNP-Ag-I incubation with PBS for 0 h (a), 24 h (b) and 48 h (c). UV-vis-NIR spectra of MNP, MNP-I and MNP-Ag-I incubation with serum for 0 h (a), 24 h (b) and 48 h (c).

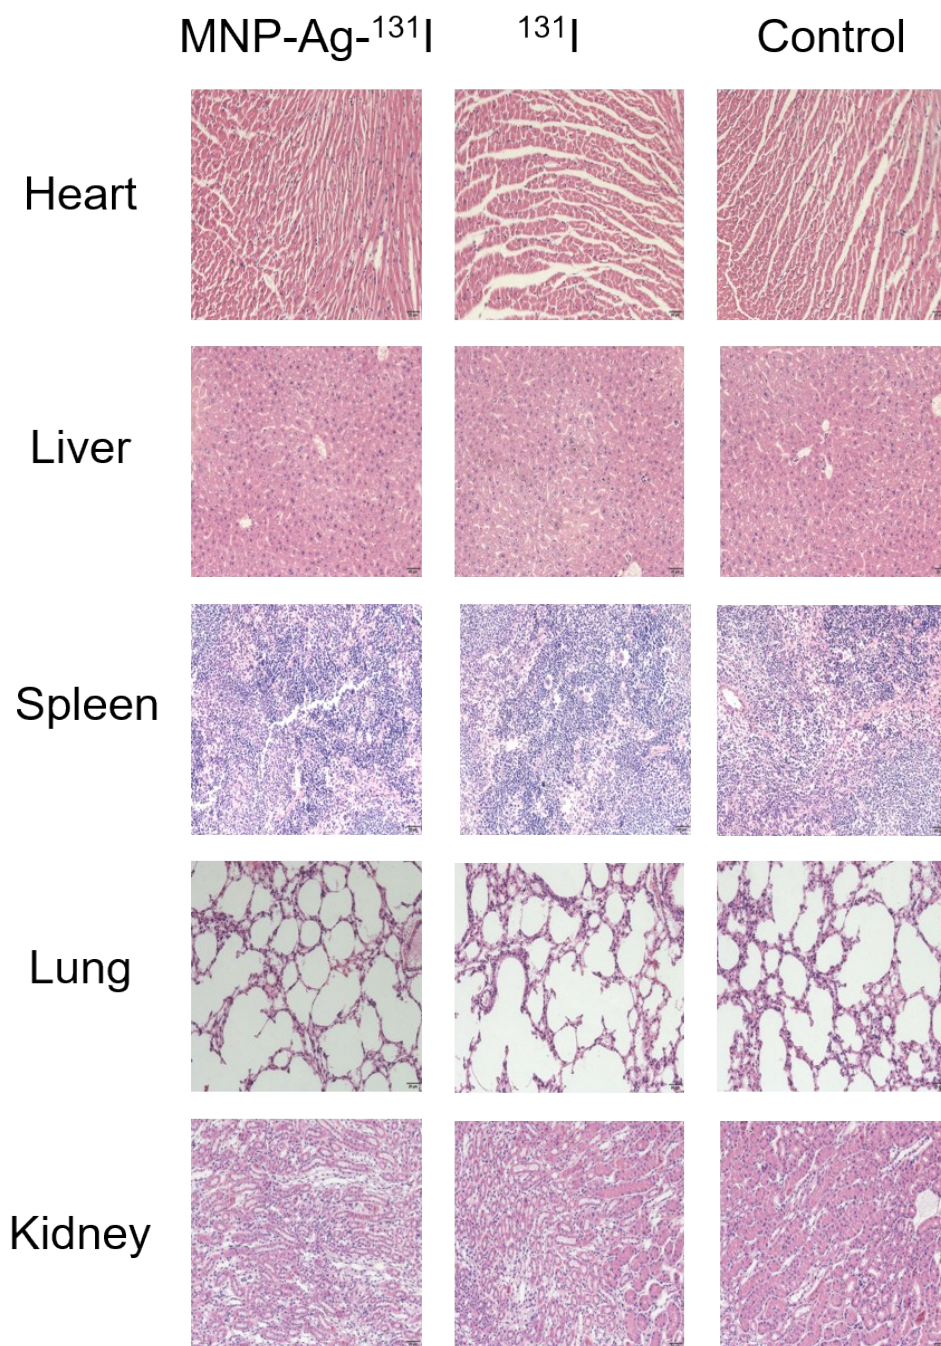

Figure S4. HE staining of the sections of main organs including heart, liver, spleen, lung and kidney in MNP-Ag-<sup>131</sup>I, <sup>131</sup>I and control groups after treatment.

**Table S1.** Atomic percentage of MNP, MNP-Ag-I determined by XPS survey.

| Element  | C     | O     | N    | Ag   | I    |
|----------|-------|-------|------|------|------|
| MNP      | 74.31 | 19.76 | 4.6  | 0.07 | 0.27 |
| MNP-Ag-I | 73.02 | 18.48 | 4.38 | 2.03 | 2.08 |
